# Supplementary material for: Elucidating the toluene formation mechanism in the reaction of propargyl radical with 1,3-butadiene
Source: Royal Society of Chemistry journal article supplement (doi:10.1039/d3cp01061a), 2023-01-01
Supplement: d3cp01061a2.pdf [file d3cp01061a2.pdf]

## *Supporting Information of*

Elucidating the toluene formation mechanism in the  
reaction of propargyl radical with 1,3-butadiene

*Jianhui Jin,<sup>a#</sup> Cheng Xie,<sup>b#</sup> Jiao Gao,<sup>c#</sup> Hong Wang,<sup>b</sup> Jinyang Zhang,<sup>d</sup> Yujie Zhao,<sup>a\*</sup>*

*Min Gao,<sup>e</sup> Jiabi Ma,<sup>e</sup> Zhandong Wang<sup>b,d</sup>, and Jiwen Guan,<sup>b\*</sup>*

<sup>a</sup> School of Nuclear Science and Engineering, East China University of Technology, Nanchang 330013, People's Republic of China

<sup>b</sup> National Synchrotron Radiation Laboratory, University of Science and Technology of China, Hefei, Anhui 230029, P. R. China.

<sup>c</sup> Dalian Institute of Chemical Physics, Dalian, 116023 P. R. China;

<sup>d</sup> State Key Laboratory of Fire Science, University of Science and Technology of China, Hefei, Anhui 230026, PR China

<sup>e</sup> School of Chemistry and Chemical Engineering, Beijing Institute of Technology, Beijing 102488, P. R. China

\*E-mail: [jackzyj@ustc.edu.cn](mailto:jackzyj@ustc.edu.cn), [jguan43@ustc.edu.cn](mailto:jguan43@ustc.edu.cn);

#J. Jin, C. Xie, and J. Gao contributed equally to this work.

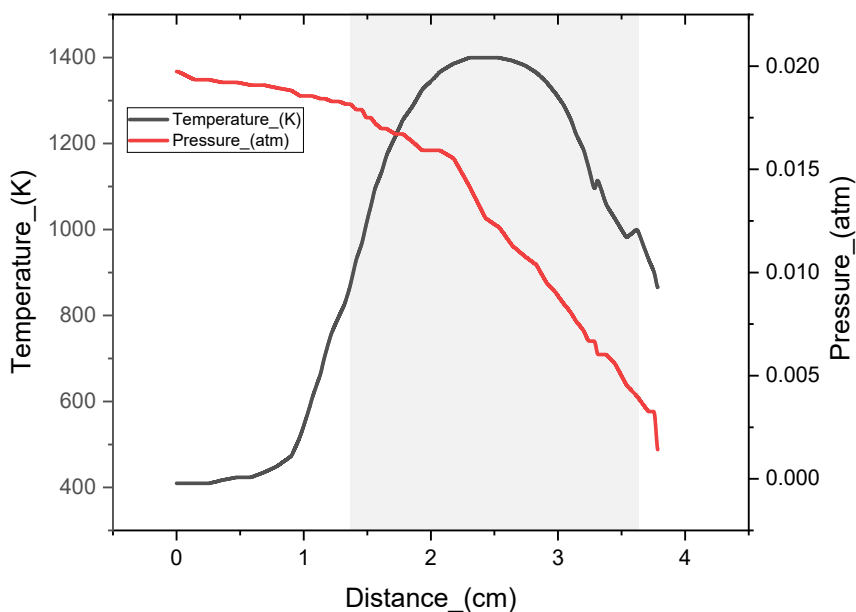

Figure S1. The temperature and pressure profiles within the reactor used in the SiC reaction simulation. The grey shaded area defines the heated section of the SiC tube. The line shapes are taken from ref. [4].

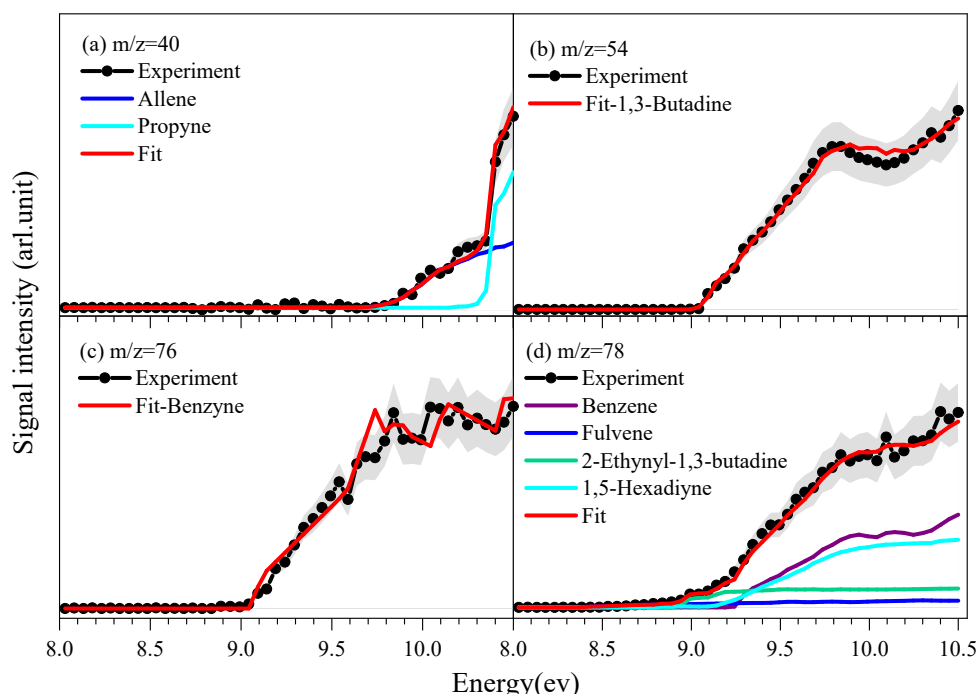

Figure S2. Photoionization efficiency (PIE) curves for signal at  $m/z = 39$  (a) [1], 54 (b) [2], 76 (c) [3], and (d) 78 [4] in the propargyl addition to 1,3-butadiene reactions at the temperature of 1400 K. Black dots: experimentally derived PIE curves; colored lines (green, blue, purple): reference PIE curves; red line: overall fit; The overall error shades are  $\pm 15\%$  signal intensity based on the accuracy of the photodiode.

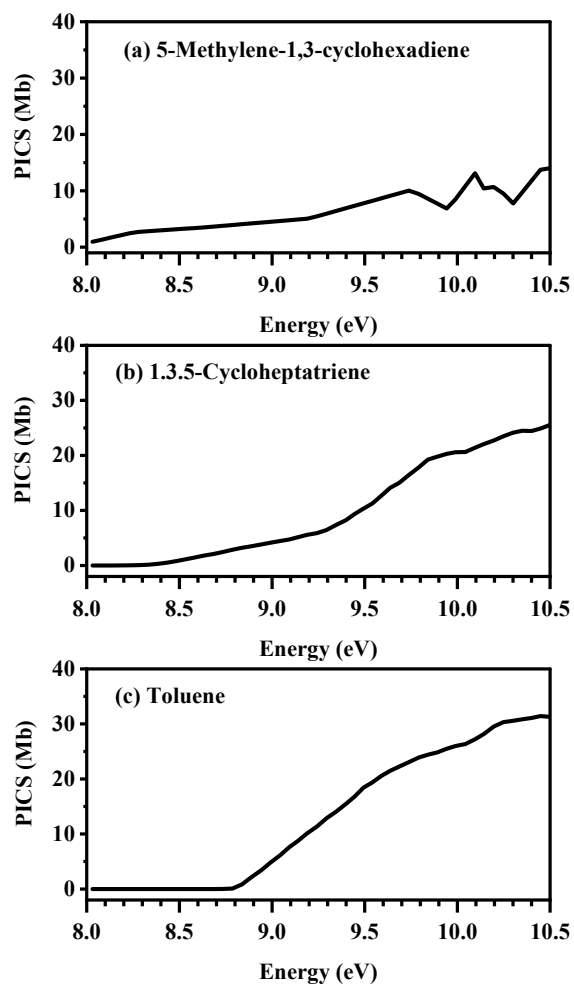

Figure S3. Absolute photoionization cross sections (PICS) of 5-methylene-1,3-cyclohexadiene (a), 1,3,5-cycloheptatriene (b), and toluene (c). (a)-(c) are taken from the references [3, 5], and (b) is measured in this work. (a) is the estimated PICS.

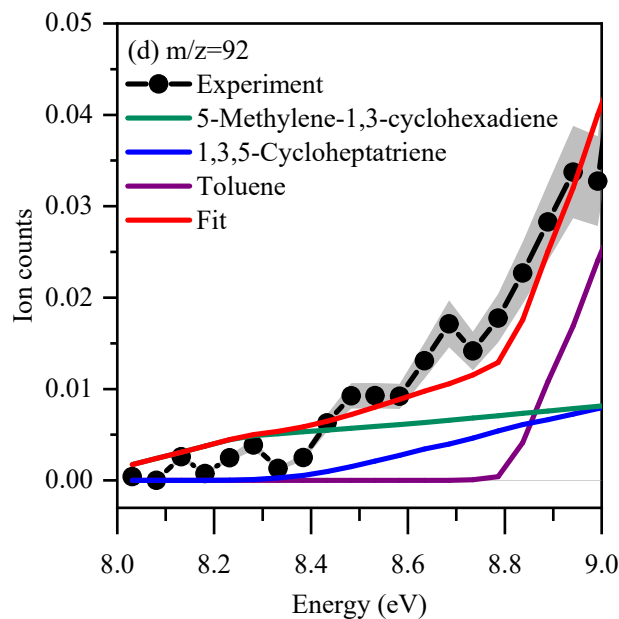

Figure S4. Photoionization efficiency (PIE) curve in the energy of 8-9 eV for the signal at  $m/z = 92$  in the propargyl addition to 1,3-butadiene reactions at the temperature of 1400 K. Black and dotted curve: experimentally derived PIE curves; colored lines: reference PIE curves; and red lines: overall fit.

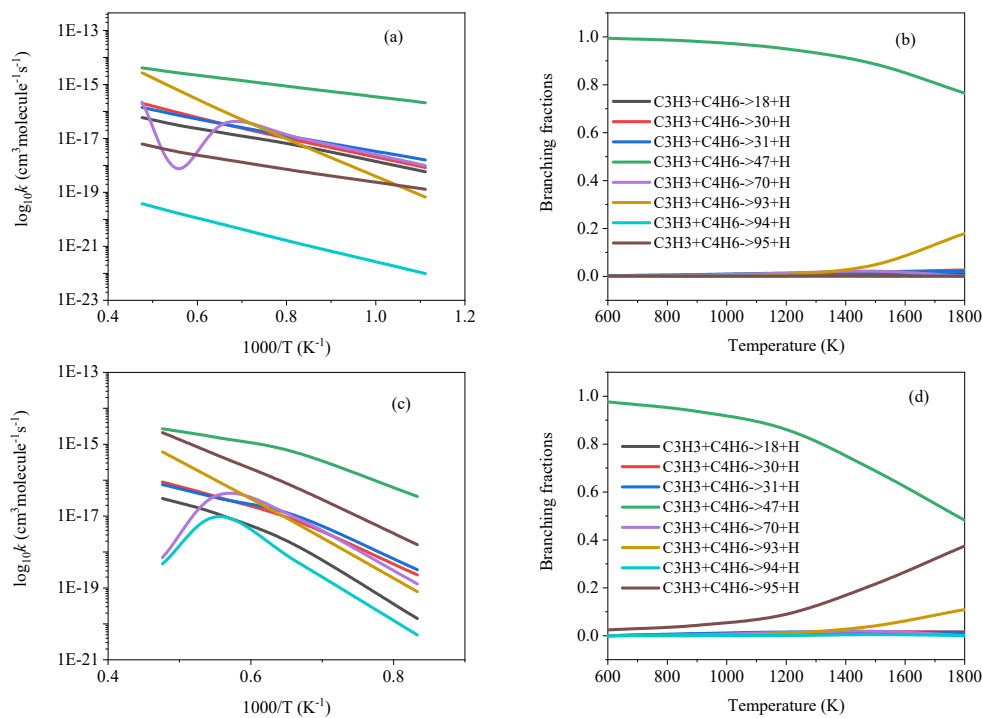

Figure S5. Calculated rate coefficients and the corresponding branching fractions for the propargyl addition to 1,3-butadiene leading to different  $C_7H_8$  isomeric products at 7.6 Torr (a)-(b), at 760 Torr (c)-(d) at the CBS-QB3 level [6].

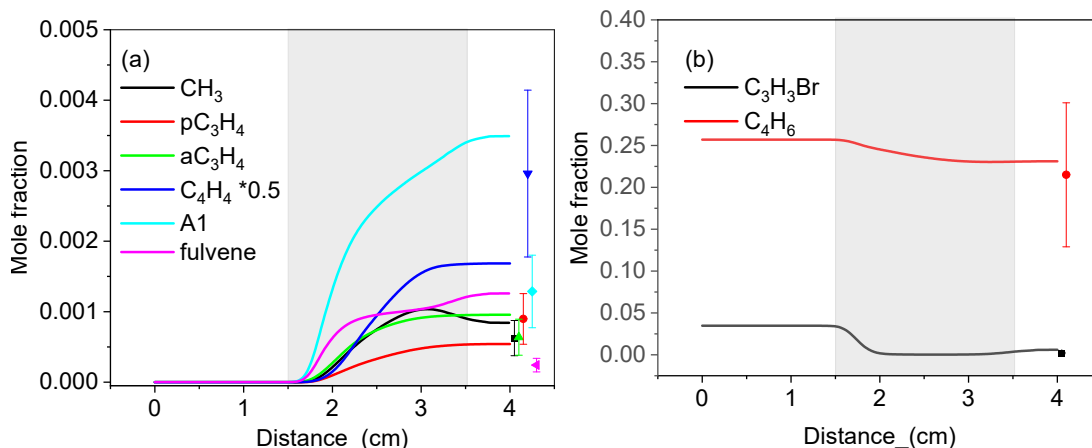

Figure S6. Simulated profiles (lines) and experimental measurements (open symbols with the error bars) of the mole fraction ratios of C<sub>3</sub>H<sub>4</sub>, C<sub>4</sub>H<sub>4</sub>, C<sub>3</sub>H<sub>3</sub>Br, C<sub>4</sub>H<sub>6</sub> along the reactor axis. The experimental measurements are presented at different x positions for clarity. The grey shaded area defines the heated section of the SiC tube.

Table S1. Relative enthalpies ( $\Delta H$ ), and Gibbs free energies ( $\Delta G$ ) of isomerization reactions from 47 to 101, and 47 to 44 calculated at different levels of theory. Units are in kcal/mol. For the CCSD(T), the structures are optimized at the level of M06-2X/6-311+G(d, p).

|          | M06-2X/6-311+G(d,<br>p) |            | CCSD(T)/6-311+G(d,<br>p) |            | CCSD(T)/CBS |            |
|----------|-------------------------|------------|--------------------------|------------|-------------|------------|
|          | $\Delta H$              | $\Delta G$ | $\Delta H$               | $\Delta G$ | $\Delta H$  | $\Delta G$ |
| 47       | 0                       | 0          | 0                        | 0          | 0           | 0          |
| TS47-101 | 75.0                    | 75.5       | 77.7                     | 78.2       | 77.5        | 78.0       |
| 101      | 71.6                    | 71.5       | 70.4                     | 70.3       | 72.0        | 71.9       |
| TS47-44  | 60.4                    | 60.8       | 64.4                     | 64.7       | 61.4        | 61.7       |
| 44       | -33.5                   | -34.2      | -30.6                    | -31.3      | -31.7       | -32.4      |

Table S2. Calculated rate constants for H-assisted isomerization and unimolecular isomerization between 5-methylene-1,3-cyclohexadiene 47, toluene 44, and 1,3,5-cycloheptatriene 9 at the pressure of 7.6, 22.8, 76, 760 torr, respectively.

| □<br>T/reaction | H-assisted (cm <sup>3</sup> mol <sup>-1</sup> s <sup>-1</sup> ) |          |           |           | □<br>47→9 | Unimolecular (s <sup>-1</sup> ) |          |          |
|-----------------|-----------------------------------------------------------------|----------|-----------|-----------|-----------|---------------------------------|----------|----------|
|                 | 47+H→9+H                                                        | 9+H→47+H | 47+H→44+H | 44+H→47+H |           | 9→47                            | 47→44    | 44→47    |
| 600             | 5.32E+04                                                        | 1.64E+05 | 1.58E+13  | 7.48E+00  | 1.28E-16  | 3.91E-16                        | 5.16E-11 | 3.07E-22 |
| 800             | 6.15E+06                                                        | 2.06E+07 | 3.15E+13  | 8.53E+03  | 1.66E-09  | 5.43E-09                        | 3.78E-05 | 1.65E-13 |
| 1000            | 9.99E+07                                                        | 3.53E+08 | 5.14E+13  | 6.34E+05  | 2.76E-05  | 9.36E-05                        | 1.33E-01 | 3.13E-08 |
| 1200            | 6.68E+08                                                        | 2.46E+09 | 7.49E+13  | 1.19E+07  | 1.32E-02  | 4.53E-02                        | 2.72E+01 | 9.36E-05 |
| 1400            | 2.77E+09                                                        | 1.06E+10 | 1.01E+14  | 1.00E+08  | 6.93E-01  | 2.38E+00                        | 8.94E+02 | 2.12E-02 |
| 1600            | 8.38E+09                                                        | 3.27E+10 | 1.29E+14  | 5.10E+08  | 8.67E+00  | 2.96E+01                        | 8.39E+03 | 8.55E-01 |
| 1800            | 2.01E+10                                                        | 8.01E+10 | 1.58E+14  | 1.83E+09  | 4.47E+01  | 1.54E+02                        | 3.53E+04 | 1.13E+01 |
| 2000            | 4.07E+10                                                        | 1.64E+11 | 1.86E+14  | 5.12E+09  | 1.44E+02  | 5.12E+02                        | 9.31E+04 | 7.45E+01 |

P=7.6torr

| □<br>T/reaction | H-assisted (cm <sup>3</sup> mol <sup>-1</sup> s <sup>-1</sup> ) |          |           |           | □<br>47→9 | Unimolecular (s <sup>-1</sup> ) |          |          |
|-----------------|-----------------------------------------------------------------|----------|-----------|-----------|-----------|---------------------------------|----------|----------|
|                 | 47+H→9+H                                                        | 9+H→47+H | 47+H→44+H | 44+H→47+H |           | 9→47                            | 47→44    | 44→47    |
| 600             | 2.49E+04                                                        | 7.66E+04 | 1.57E+13  | 7.44E+00  | 1.28E-16  | 3.91E-16                        | 5.16E-11 | 3.07E-22 |
| 800             | 4.45E+06                                                        | 1.48E+07 | 3.15E+13  | 8.53E+03  | 1.68E-09  | 5.50E-09                        | 3.78E-05 | 1.65E-13 |
| 1000            | 9.14E+07                                                        | 3.23E+08 | 5.14E+13  | 6.34E+05  | 3.00E-05  | 1.02E-04                        | 1.35E-01 | 3.19E-08 |
| 1200            | 6.55E+08                                                        | 2.42E+09 | 7.49E+13  | 1.19E+07  | 1.70E-02  | 5.83E-02                        | 3.03E+01 | 1.04E-04 |
| 1400            | 2.77E+09                                                        | 1.05E+10 | 1.01E+14  | 1.00E+08  | 1.11E+00  | 3.82E+00                        | 1.17E+03 | 2.77E-02 |
| 1600            | 8.38E+09                                                        | 3.27E+10 | 1.29E+14  | 5.10E+08  | 1.72E+01  | 5.87E+01                        | 1.32E+04 | 1.34E+00 |
| 1800            | 2.01E+10                                                        | 8.01E+10 | 1.58E+14  | 1.83E+09  | 1.04E+02  | 3.53E+02                        | 6.41E+04 | 2.04E+01 |
| 2000            | 4.07E+10                                                        | 1.64E+11 | 1.86E+14  | 5.12E+09  | 3.59E+02  | 1.24E+03                        | 1.86E+05 | 1.49E+02 |

P=22.8Torr

| □          | H-assisted (cm <sup>3</sup> mol <sup>-1</sup> s <sup>-1</sup> ) |          |           |           | Unimolecular (s <sup>-1</sup> ) |          |          |          |
|------------|-----------------------------------------------------------------|----------|-----------|-----------|---------------------------------|----------|----------|----------|
| T/reaction | 47+H→9+H                                                        | 9+H→47+H | 47+H→44+H | 44+H→47+H | 47→9                            | 9→47     | 47→44    | 44→47    |
| 600        | 9.06E+03                                                        | 2.79E+04 | 1.51E+13  | 7.14E+00  | 1.28E-16                        | 3.92E-16 | 5.16E-11 | 3.07E-22 |
| 800        | 2.52E+06                                                        | 8.40E+06 | 3.14E+13  | 8.50E+03  | 1.69E-09                        | 5.52E-09 | 3.79E-05 | 1.65E-13 |
| 1000       | 7.35E+07                                                        | 2.60E+08 | 5.14E+13  | 6.34E+05  | 3.12E-05                        | 1.06E-04 | 1.37E-01 | 3.22E-08 |
| 1200       | 6.14E+08                                                        | 2.26E+09 | 7.49E+13  | 1.19E+07  | 2.00E-02                        | 6.86E-02 | 3.23E+01 | 1.11E-04 |
| 1400       | 2.76E+09                                                        | 1.05E+10 | 1.01E+14  | 1.00E+08  | 1.62E+00                        | 5.55E+00 | 1.43E+03 | 3.39E-02 |
| 1600       | 8.36E+09                                                        | 3.26E+10 | 1.29E+14  | 5.10E+08  | 3.15E+01                        | 1.07E+02 | 1.93E+04 | 1.97E+00 |
| 1800       | 2.01E+10                                                        | 8.00E+10 | 1.58E+14  | 1.83E+09  | 2.31E+02                        | 7.80E+02 | 1.12E+05 | 3.57E+01 |
| 2000       | 4.07E+10                                                        | 1.64E+11 | 1.86E+14  | 5.12E+09  | 9.04E+02                        | 3.06E+03 | 3.68E+05 | 2.95E+02 |

P=76Torr

| □          | H-assisted (cm <sup>3</sup> mol <sup>-1</sup> s <sup>-1</sup> ) |          |           |           | □        | Unimolecular (s <sup>-1</sup> ) |          |          | □ |
|------------|-----------------------------------------------------------------|----------|-----------|-----------|----------|---------------------------------|----------|----------|---|
| T/reaction | 47+H→9+H                                                        | 9+H→47+H | 47+H→44+H | 44+H→47+H | 47→9     | 9→47                            | 47→44    | 44→47    |   |
| 600        | 9.02E+02                                                        | 2.78E+03 | 8.66E+12  | 4.09E+00  | 1.28E-16 | 3.92E-16                        | 5.16E-11 | 3.07E-22 |   |
| 800        | 4.44E+05                                                        | 1.48E+06 | 2.76E+13  | 7.47E+03  | 1.69E-09 | 5.53E-09                        | 3.79E-05 | 1.65E-13 |   |
| 1000       | 2.64E+07                                                        | 9.33E+07 | 5.03E+13  | 6.21E+05  | 3.17E-05 | 1.08E-04                        | 1.37E-01 | 3.24E-08 |   |
| 1200       | 3.79E+08                                                        | 1.40E+09 | 7.47E+13  | 1.18E+07  | 2.21E-02 | 7.58E-02                        | 3.35E+01 | 1.15E-04 |   |
| 1400       | 2.21E+09                                                        | 8.41E+09 | 1.01E+14  | 1.00E+08  | 2.24E+00 | 7.70E+00                        | 1.68E+03 | 4.00E-02 |   |
| 1600       | 7.66E+09                                                        | 2.99E+10 | 1.29E+14  | 5.10E+08  | 6.32E+01 | 2.15E+02                        | 2.95E+04 | 3.01E+00 |   |
| 1800       | 2.00E+10                                                        | 7.95E+10 | 1.58E+14  | 1.83E+09  | 6.90E+02 | 2.32E+03                        | 2.35E+05 | 7.49E+01 |   |
| 2000       | 4.06E+10                                                        | 1.64E+11 | 1.86E+14  | 5.12E+09  | 3.74E+03 | 1.24E+04                        | 1.03E+06 | 8.21E+02 |   |

P=760Torr

Table S3. Kinetic parameters for reactions updated in the SiC model.

|        | reaction                                                                                               | A                 | n                           | Ea(cal)                  | Factor                    | Ref.              |
|--------|--------------------------------------------------------------------------------------------------------|-------------------|-----------------------------|--------------------------|---------------------------|-------------------|
| R12    | $1,3\text{-C}_4\text{H}_6 = \text{C}_2\text{H}_4 + \text{C}_2\text{H}_2$                               | 6.40E+13          | 0.00                        | 77100                    | $\times 1$                | [7] <sup>b</sup>  |
| R13    | $1,3\text{-C}_4\text{H}_6 = 1,2\text{-C}_4\text{H}_6$                                                  | 8.19E+74          | -17.56                      | 115782                   | $\times 1$                | [8] <sup>b</sup>  |
| R14    | $\text{C}_3\text{H}_3 + \text{CH}_3 (+\text{M}) = 1,2\text{-C}_4\text{H}_6 (+\text{M})$                |                   |                             |                          | $\times 1$                | [9] <sup>b</sup>  |
|        | $k_0$                                                                                                  | 2.60E+58          | -11.94                      | 9770                     |                           |                   |
|        | $k_\infty$                                                                                             | 1.50E+13          | 0.00                        | 0                        |                           |                   |
|        | $F_{cent}^e$                                                                                           | 0.175( $\alpha$ ) | 1.34E+3(T <sup>***</sup> )  | 6.00E+4(T <sup>*</sup> ) | 9.77E+3(T <sup>**</sup> ) |                   |
| R15    | $1,3\text{-C}_4\text{H}_6 + \text{Br} = \text{HBr} + i\text{-C}_4\text{H}_5$                           | 3.01E+10          | 0.00                        | 0                        | $\times 1$                | [10] <sup>b</sup> |
| R16    | $\text{C}_4\text{H}_4 + \text{H} = i\text{-C}_4\text{H}_5$                                             |                   |                             |                          | $\times 1$                | [11] <sup>b</sup> |
|        | 0.013atm                                                                                               | 6.10E+53          | -13.19                      | 14200                    |                           |                   |
|        | 0.026atm                                                                                               | 9.60E+52          | -12.85                      | 14300                    |                           |                   |
|        | 0.118atm                                                                                               | 2.10E+52          | -12.44                      | 15500                    |                           |                   |
|        | 1atm                                                                                                   | 4.90E+51          | -11.92                      | 17700                    |                           |                   |
|        | 10atm                                                                                                  | 1.50E+48          | -10.58                      | 18800                    |                           |                   |
| R23    | $\text{C}_3\text{H}_3 + \text{C}_4\text{H}_4 = \text{C}_6\text{H}_5\text{CH}_2$                        |                   |                             |                          | $\times 1$                | [12] <sup>c</sup> |
|        | 0.1atm                                                                                                 | 6.84E+82          | -20.80                      | 60200                    |                           |                   |
| R18    | $1,3\text{-C}_4\text{H}_6 + \text{C}_3\text{H}_3 = \text{C}_7\text{H}_8 (47) + \text{H}$               |                   |                             |                          | $\times 2$                | [13] <sup>c</sup> |
|        | 0.1atm                                                                                                 | 1.80E+07          | 0.86                        | 6887                     |                           |                   |
| R9     | $\text{C}_3\text{H}_3\text{Br} = \text{C}_3\text{H}_3 + \text{Br}$                                     | 4.52E+12          | -0.52                       | 36983                    |                           | [4] <sup>b</sup>  |
| R6(a)  | $1,3\text{-C}_4\text{H}_6 + \text{C}_3\text{H}_3 = 1,3\text{-NC}_4\text{H}_5 + a\text{-C}_3\text{H}_4$ | 1.00E+13          | 0.00                        | 22500                    |                           | [7] <sup>b</sup>  |
| R6(b)  | $1,2\text{-C}_4\text{H}_6 + \text{C}_3\text{H}_3 = 1,2\text{-C}_4\text{H}_5 + a\text{-C}_3\text{H}_4$  | 5.00E+12          | 0.00                        | 19522                    |                           | [7] <sup>b</sup>  |
| R7     | $\text{C}_3\text{H}_3 + \text{C}_3\text{H}_3 = \text{C}_6\text{H}_5 + \text{H}$                        |                   |                             |                          | $\times 0.1$              | [14] <sup>b</sup> |
|        | 0.03947atm                                                                                             | 1.05E+54          | -11.88                      | 28757                    |                           |                   |
|        | 1atm                                                                                                   | 1.70E+48          | -9.98                       | 36755                    |                           |                   |
|        | 10atm                                                                                                  | 3.67E+26          | -3.88                       | 28963                    |                           |                   |
| R10(a) | $\text{C}_3\text{H}_3 + \text{C}_3\text{H}_3 = \text{fulvene}$                                         |                   |                             |                          | $\times 0.1$              | [14] <sup>b</sup> |
|        | 0.03947atm                                                                                             | 6.30E+76          | -19.07                      | 31542                    |                           |                   |
|        | 1atm                                                                                                   | 1.38E+66          | -15.66                      | 28260                    |                           |                   |
|        | 10atm                                                                                                  | 1.26E+56          | -12.61                      | 23515                    |                           |                   |
| R10(b) | $\text{C}_3\text{H}_3 + \text{C}_3\text{H}_3 = \text{A1 (benzene)}$                                    |                   |                             |                          | $\times 0.1$              | [14] <sup>b</sup> |
|        | 0.03947atm                                                                                             | 1.82E+74          | -18.14                      | 31896                    |                           |                   |
|        | 1atm                                                                                                   | 3.16E+55          | -12.55                      | 22264                    | /                         |                   |
|        | 10atm                                                                                                  | 3.89E+50          | -11.01                      | 20320                    |                           |                   |
| R17    | $\text{C}_6\text{H}_5\text{CH}_3 (+\text{M}) = \text{C}_6\text{H}_5 + \text{CH}_3 (+\text{M})$         |                   |                             |                          | $\times 1$                | [15] <sup>b</sup> |
|        | $k_0$                                                                                                  | 1.00E+98          | -22.97                      | 122080                   |                           |                   |
|        | $k_\infty$                                                                                             | 1.95E+27          | -3.16                       | 107447                   |                           |                   |
|        | $F_{cent}^e$                                                                                           | 0.705( $\alpha$ ) | 1.00E+10(T <sup>***</sup> ) | 4.60E+2(T <sup>*</sup> ) | 8.21E+9(T <sup>**</sup> ) |                   |



Table S3. Continued table.

|       |                                   |                   |                          |                           |                           |                    |
|-------|-----------------------------------|-------------------|--------------------------|---------------------------|---------------------------|--------------------|
| R11   | $C_6H_5CH_2+H=C_6H_5+CH_3$        | □                 | □                        | □                         | ×1                        | □[16] <sup>b</sup> |
| □     | 0.0395                            | 4.50E+58          | -11.9                    | 51860                     |                           | □                  |
| □     | 0.132                             | 2.03E+64          | -13.37                   | 59520                     |                           | □                  |
| □     | 1                                 | 5.83E+67          | -14.15                   | 68330                     |                           | □                  |
| □     | 10                                | 8.85E+68          | -14.23                   | 78410                     |                           | □                  |
| R8(a) | $C_6H_5(+M)=o-C_6H_4+H(+M)$       | □                 | □                        | □                         | ×1                        | □[17] <sup>b</sup> |
| □     | $k_0$                             | 1.00E+84          | -18.87                   | 90064                     |                           | □                  |
| □     | $k_\infty$                        | 4.30E+12          | 0.62                     | 77313                     |                           | □                  |
| □     | $F_{cent}^e$                      | 0.902( $\alpha$ ) | 696(T <sup>***</sup> )   | 358(T <sup>*</sup> )      | 3856(T <sup>**</sup> )    | □                  |
| R8(b) | $C_6H_5 + C_6H_5 = A1 + o-C_6H_4$ | 1.71E-03          | 4.57                     | -5739                     |                           | □[18] <sup>b</sup> |
| R2    | $C_6H_5CH_3(+M)=C_6H_5CH_2+H(+M)$ | □                 | □                        | □                         | ×1                        | □[15] <sup>b</sup> |
| □     | $k_0$                             | 1.00E+98          | -22.86                   | 99882                     |                           | □                  |
| □     | $k_\infty$                        | 2.78E+15          | 0.17                     | 91168                     |                           | □                  |
| □     | $F_{cent}^e$                      | 0.065( $\alpha$ ) | 15.11(T <sup>***</sup> ) | 1.00E+10(T <sup>*</sup> ) | 7.60E+7(T <sup>**</sup> ) | □                  |
| R19   | $C_7H_8(47)=C_6H_5CH_3(44)$       | □                 | □                        | □                         | ×1                        | This work          |
| □     | 0.01atm                           | 1.57E+49          | -10.92                   | 76070.0947                |                           | □                  |
| □     | 0.03atm                           | 2.05E+44          | -9.41                    | 73984.3664                |                           | □                  |
| □     | 0.10atm                           | 9.08E+38          | -7.76                    | 72261.3277                |                           | □                  |
| R20   | $C_7H_8(47)+H=C_6H_5CH_3(44)+H$   | □                 | □                        | □                         | ×1                        | This work          |
| □     | 0.01atm                           | 6.81E+10          | 1.11                     | 2030                      |                           | □                  |
| □     | 0.03atm                           | 7.13E+10          | 1.10                     | 2040                      |                           | □                  |
| □     | 0.1atm                            | 9.69E+10          | 1.07                     | 2150                      |                           | □                  |
| R21   | $C_3H_3+iC_4H_5=C_6H_5CH_3(44)$   | □                 | □                        | □                         | ×0.1                      | □[14] <sup>d</sup> |
| □     | 0.03947atm                        | 1.82E+74          | -18.14                   | 31896                     |                           | □                  |
| □     | 1atm                              | 3.16E+55          | -12.55                   | 22264                     |                           | □                  |
| □     | 10atm                             | 3.89E+50          | -11.01                   | 20320                     |                           | □                  |
| R22   | $C_3H_3+i-C_4H_5=C_6H_5CH_2+H$    | □                 | □                        | □                         | ×0.1                      | □[14] <sup>d</sup> |
| □     | 0.03947atm                        | 1.05E+54          | -11.88                   | 28757                     |                           | □                  |
| □     | 1atm                              | 1.70E+48          | -9.98                    | 36755                     |                           | □                  |
| □     | 10atm                             | 3.67E+26          | -3.88                    | 28963                     |                           | □                  |

<sup>a</sup> Rate constants are given in the form,  $k = AT^n \exp(-Ea/RT)$ . The units are cm<sup>3</sup>, Mol, cal, s, and K

<sup>b</sup> Take from literature

<sup>c</sup> Rate constant estimated from the value given in reference.

<sup>d</sup> Estimated by analogy with the  $C_3H_3+C_3H_3$  reactions of literature[14].

<sup>e</sup>  $F_{cent} = (1-\alpha)\exp(-T/T^{***}) + \alpha\exp(-T/T^*) + \exp(-T^{**}/T)$

Table S4. The simulated and experimental mole fractions of all species at the exit of the microreactor.

| $\square$                                          | $X_i$ (Model) | $X_i^a \pm \Delta X_i^b$ (Exp.) |
|----------------------------------------------------|---------------|---------------------------------|
| C <sub>3</sub> H <sub>3</sub> Br                   | 5.98E-03      | (2.15±0.86)E-3                  |
| C <sub>6</sub> H <sub>6</sub> CH <sub>2</sub> (47) | 1.43E-04      | (1.93±0.77)E-4                  |
| C <sub>7</sub> H <sub>8</sub> (9)                  | 1.00E-07      | (1.20±0.48)E-4                  |
| CH <sub>3</sub>                                    | 8.42E-04      | (6.25±2.50)E-4                  |
| C <sub>3</sub> H <sub>3</sub>                      | 8.91E-03      | (4.89±1.96)E-3                  |
| pC <sub>3</sub> H <sub>4</sub>                     | 5.41E-04      | (8.98±3.59)E-4                  |
| aC <sub>3</sub> H <sub>4</sub>                     | 9.56E-04      | (6.38±2.55)E-4                  |
| C <sub>4</sub> H <sub>4</sub>                      | 3.37E-03      | (5.92±2.37)E-3                  |
| C <sub>4</sub> H <sub>6</sub>                      | 2.31E-01      | (2.12±0.85)E-1                  |
| A1                                                 | 3.49E-03      | (1.29±0.52)E-3                  |
| fulvene                                            | 1.26E-03      | (2.42±0.97)E-4                  |
| A1CH <sub>3</sub> (44)                             | 3.98E-04      | (3.01±1.20)E-4                  |
| C <sub>6</sub> H <sub>5</sub> CH <sub>2</sub>      | 2.20E-04      | (3.62±1.45)E-4                  |

$$X_i(T) = X_A(T) \frac{S_i(T,E) \sigma_A(E) D_A}{S_A(T,E) \sigma_i(E) D_i}$$

<sup>a</sup> Mole fraction calculated by  $X_i(T) = X_A(T) \frac{S_i(T,E) \sigma_A(E) D_A}{S_A(T,E) \sigma_i(E) D_i}$ , where  $T$  and  $E$  is selected at 1400 K, 10.5 eV, respectively.  $S$  is the integral intensity of the mass spectral signal, and  $\sigma$  is the photoionization cross-section, and  $D$  is the mass discrimination factor.

<sup>b</sup> The estimated error consists of  $\Delta S$  (15%) +  $\Delta \sigma$  (15%) +  $\Delta D$  (10%).

Table S5. CCSD(T)//M06-2X geometries, energies, and vibrational frequencies.

**9**

| Atom | X        | Y        | Z        | (Angstrom) |
|------|----------|----------|----------|------------|
| C    | 0.9629   | -1.22165 | -0.2019  |            |
| C    | 1.46122  | 0        | 0.52803  |            |
| C    | 0.9629   | 1.22165  | -0.2019  |            |
| C    | -0.34762 | 1.52755  | -0.26608 |            |
| C    | -1.42868 | 0.68081  | 0.18605  |            |
| C    | -1.42868 | -0.68081 | 0.18605  |            |
| C    | -0.34762 | -1.52755 | -0.26608 |            |
| H    | 1.68919  | -1.87563 | -0.67539 |            |
| H    | 2.55047  | 0        | 0.59061  |            |
| H    | 1.06693  | 0        | 1.5529   |            |
| H    | -2.36558 | -1.17803 | 0.42349  |            |
| H    | 1.68919  | 1.87563  | -0.67539 |            |
| H    | -0.63557 | 2.47637  | -0.71232 |            |
| H    | -2.36558 | 1.17803  | 0.42349  |            |
| H    | -0.63557 | -2.47637 | -0.71232 |            |

ZPE **0.128984** (Hartree)CCSD(T)/cc-pVDZ **-270.82747** (Hartree)Frequencies cm<sup>-1</sup>:

|           |           |           |           |           |           |
|-----------|-----------|-----------|-----------|-----------|-----------|
| 235.4635  | 293.7084  | 359.4857  | 411.8169  | 433.2483  | 613.416   |
| 668.3199  | 735.9959  | 770.1913  | 820.8595  | 887.0635  | 938.5021  |
| 953.7725  | 978.9767  | 999.5364  | 1005.6678 | 1022.5305 | 1048.3037 |
| 1075.3998 | 1207.3421 | 1222.0572 | 1246.8535 | 1271.8856 | 1329.9344 |
| 1383.762  | 1423.212  | 1480.267  | 1482.0079 | 1618.726  | 1701.6741 |
| 1703.6296 | 3039.8262 | 3140.14   | 3166.7047 | 3175.05   | 3179.0527 |
| 3190.8563 | 3199.2646 | 3202.9016 |           |           |           |

**44**

| Atom | X        | Y        | Z        | (Angstrom) |
|------|----------|----------|----------|------------|
| C    | 0.19274  | 1.20064  | -0.00818 |            |
| C    | -1.20056 | 1.20198  | 0.00205  |            |
| C    | -1.90155 | -0.00127 | 0.00793  |            |
| C    | -1.19736 | -1.20371 | 0.00184  |            |
| C    | 0.19494  | -1.19937 | -0.00836 |            |
| C    | 0.91234  | 0.00191  | -0.01101 |            |
| H    | -1.73786 | 2.14408  | 0.00169  |            |
| H    | -2.98568 | -0.00267 | 0.01304  |            |
| H    | -1.73292 | -2.14682 | 0.00126  |            |
| H    | 0.73386  | -2.1418  | -0.0167  |            |

|   |         |          |          |
|---|---------|----------|----------|
| C | 2.42193 | 0.00076  | 0.00882  |
| H | 2.82717 | 0.93345  | -0.39003 |
| H | 2.80237 | -0.11177 | 1.03017  |
| H | 2.82864 | -0.82417 | -0.58161 |
| H | 0.72951 | 2.14415  | -0.01638 |

ZPE **0.128586** (Hartree)  
 CCSD(T)/cc-pVDZ **-270.8761935** (Hartree)

Frequencies  $\text{cm}^{-1}$  :

|           |           |           |           |           |           |
|-----------|-----------|-----------|-----------|-----------|-----------|
| 33.8284   | 210.5402  | 346.1739  | 412.3978  | 474.5556  | 528.4594  |
| 633.9038  | 713.8824  | 750.1268  | 806.3541  | 867.8624  | 926.0072  |
| 999.9699  | 1005.6584 | 1018.417  | 1019.4814 | 1062.7311 | 1066.9178 |
| 1117.3985 | 1177.8431 | 1204.4971 | 1244.9023 | 1322.4747 | 1352.7428 |
| 1416.7006 | 1476.5431 | 1495.4939 | 1510.3399 | 1541.4403 | 1658.7386 |
| 1681.1605 | 3062.1688 | 3125.2667 | 3147.9584 | 3190.5136 | 3192.473  |
| 3205.7772 | 3214.7347 | 3226.2724 |           |           |           |

**47**

| Atom | X        | Y        | Z        | (Angstrom) |
|------|----------|----------|----------|------------|
| C    | -0.24022 | -1.27891 | 0.17521  |            |
| C    | 1.23895  | -1.14408 | -0.07881 |            |
| C    | 1.83995  | 0.0514   | -0.11526 |            |
| C    | 1.06857  | 1.28183  | 0.03626  |            |
| C    | -0.27745 | 1.26153  | 0.09869  |            |
| C    | -1.03287 | 0.01414  | 0.02484  |            |
| C    | -2.36356 | 0.01298  | -0.15152 |            |
| H    | 1.8139   | -2.05834 | -0.18514 |            |
| H    | -0.66743 | -2.05931 | -0.4626  |            |
| H    | -0.36715 | -1.64814 | 1.20535  |            |
| H    | 1.60008  | 2.22694  | 0.06172  |            |
| H    | 2.91205  | 0.12548  | -0.26243 |            |
| H    | -0.84005 | 2.18803  | 0.15547  |            |
| H    | -2.92817 | -0.90817 | -0.24509 |            |
| H    | -2.92345 | 0.94013  | -0.20381 |            |

ZPE **0.127793** (Hartree)  
 CCSD(T)/cc-pVDZ **-270.8264475** (Hartree)

Frequencies  $\text{cm}^{-1}$  :

|           |           |           |           |           |           |
|-----------|-----------|-----------|-----------|-----------|-----------|
| 92.5384   | 261.3544  | 381.8713  | 429.794   | 476.5927  | 555.7617  |
| 593.1671  | 671.0025  | 756.171   | 779.1488  | 827.4267  | 916.8121  |
| 938.0984  | 952.3805  | 967.7736  | 985.5641  | 1007.8918 | 1011.8624 |
| 1032.5444 | 1178.0697 | 1200.8445 | 1223.7233 | 1315.5304 | 1345.2604 |
| 1399.4621 | 1436.1939 | 1451.1561 | 1469.6255 | 1657.12   | 1701.162  |
| 1739.4503 | 3005.8559 | 3101.8283 | 3162.5363 | 3190.2176 | 3195.4045 |
| 3211.166  | 3221.6491 | 3250.5169 |           |           |           |

**112**

| Atom | X        | Y        | Z        | (Angstrom) |
|------|----------|----------|----------|------------|
| C    | -0.2527  | -1.20946 | 0.34118  |            |
| C    | 1.83461  | 0.14109  | -0.02812 |            |
| C    | 1.09125  | 1.28611  | 0.08342  |            |
| C    | -0.31834 | 1.269    | 0.01611  |            |
| C    | -1.05404 | 0.04527  | 0.03094  |            |
| C    | -2.39891 | 0.00227  | -0.15402 |            |
| H    | -0.79521 | -2.0997  | 0.01423  |            |
| H    | -0.15427 | -1.27788 | 1.43248  |            |
| H    | 1.59601  | 2.24256  | 0.17999  |            |
| H    | 2.91809  | 0.18604  | -0.01795 |            |
| H    | -0.86392 | 2.2044   | -0.05031 |            |
| H    | -2.94574 | -0.93325 | -0.13323 |            |
| H    | -2.97153 | 0.90678  | -0.32732 |            |
| C    | 1.15861  | -1.17966 | -0.26901 |            |
| H    | 1.09686  | -1.35408 | -1.35474 |            |
| H    | 1.75681  | -2.00255 | 0.13385  |            |

ZPE **0.137936** (Hartree)

CCSD(T)/cc-pVDZ **-271.4117074** (Hartree)

Frequencies  $\text{cm}^{-1}$  :

|           |           |           |           |           |           |
|-----------|-----------|-----------|-----------|-----------|-----------|
| 139.4743  | 215.8841  | 367.551   | 393.8965  | 493.2061  | 501.4165  |
| 560.2986  | 644.5814  | 688.1269  | 752.9444  | 791.8461  | 809.9272  |
| 890.2891  | 907.1805  | 961.6352  | 976.021   | 989.9147  | 1033.581  |
| 1052.28   | 1095.7953 | 1169.297  | 1186.9307 | 1226.0874 | 1310.5723 |
| 1330.734  | 1356.8293 | 1376.0067 | 1436.3022 | 1442.8414 | 1473.0904 |
| 1483.8147 | 1554.8841 | 1613.8418 | 3014.463  | 3048.2505 | 3103.193  |
| 3119.2685 | 3166.5917 | 3190.1516 | 3203.218  | 3215.0826 | 3259.4637 |

**113**

| Atom | X        | Y        | Z        | (Angstrom) |
|------|----------|----------|----------|------------|
| C    | -1.36223 | 0.62796  | -0.42099 |            |
| C    | -1.52537 | -0.81082 | 0.12444  |            |
| C    | -0.26917 | -1.5754  | 0.12113  |            |
| C    | 1.02846  | -1.36513 | -0.00185 |            |
| C    | 1.69233  | -0.0541  | -0.11846 |            |
| C    | 1.13806  | 1.15975  | 0.01148  |            |
| H    | -2.33546 | 1.12443  | -0.3437  |            |
| H    | -2.27544 | -1.33316 | -0.48315 |            |
| H    | -1.93522 | -0.78314 | 1.14207  |            |
| H    | 1.79629  | 2.01797  | -0.09436 |            |
| H    | -1.11327 | 0.57958  | -1.48503 |            |
| H    | 1.69477  | -2.22753 | -0.00901 |            |
| H    | 2.76036  | -0.10132 | -0.3157  |            |

|   |          |         |         |
|---|----------|---------|---------|
| C | -0.30756 | 1.48105 | 0.30821 |
| H | -0.47776 | 1.41232 | 1.39231 |
| H | -0.48139 | 2.53105 | 0.05282 |

ZPE **0.139296** (Hartree)  
 CCSD(T)/cc-pVDZ **-271.3628697** (Hartree)

Frequencies cm<sup>-1</sup> :

|           |           |           |           |           |           |
|-----------|-----------|-----------|-----------|-----------|-----------|
| 95.1778   | 234.0644  | 332.264   | 365.4911  | 381.2489  | 498.7873  |
| 580.2818  | 714.3683  | 781.3163  | 803.0573  | 846.0144  | 879.5674  |
| 885.0462  | 926.5293  | 964.0845  | 1008.718  | 1049.8052 | 1067.3611 |
| 1089.5065 | 1179.8729 | 1230.4613 | 1253.477  | 1281.0317 | 1310.0338 |
| 1359.0455 | 1367.2037 | 1370.5852 | 1427.3171 | 1469.1101 | 1481.7535 |
| 1491.1073 | 1703.0885 | 1750.1809 | 3034.285  | 3049.2051 | 3067.1771 |
| 3081.9095 | 3110.8507 | 3117.3874 | 3139.6593 | 3172.2905 | 3194.0589 |

#### 114

| Atom | X        | Y        | Z        | (Angstrom) |
|------|----------|----------|----------|------------|
| C    | -0.10409 | -0.06143 | -0.01672 |            |
| C    | -0.08444 | -0.0422  | 1.50544  |            |
| C    | 1.24366  | 0.13724  | 2.22646  |            |
| C    | 2.46478  | 0.20989  | 1.41004  |            |
| C    | 2.42644  | -0.034   | 0.04109  |            |
| C    | 1.24655  | -0.22376 | -0.6538  |            |
| C    | 0.4779   | -1.18964 | 2.28864  |            |
| H    | 1.27588  | -0.41863 | -1.72042 |            |
| H    | 3.40848  | 0.41027  | 1.90441  |            |
| H    | 0.91017  | -2.02015 | 1.74235  |            |
| H    | 0.00626  | -1.4536  | 3.22815  |            |
| H    | -0.93344 | 0.46124  | 1.95659  |            |
| H    | -0.78549 | -0.84787 | -0.37073 |            |
| H    | -0.54716 | 0.88102  | -0.37263 |            |
| H    | 1.24007  | 0.72093  | 3.14087  |            |
| H    | 3.36332  | -0.06998 | -0.50723 |            |

ZPE **0.138894** (Hartree)  
 CCSD(T)/cc-pVDZ **-271.3921887** (Hartree)

Frequencies cm<sup>-1</sup> :

|           |           |           |           |           |           |
|-----------|-----------|-----------|-----------|-----------|-----------|
| 153.9231  | 286.8998  | 349.1289  | 488.3062  | 516.7254  | 571.2776  |
| 634.8693  | 726.5443  | 763.1714  | 824.5694  | 837.9647  | 866.8271  |
| 916.4142  | 949.9365  | 973.6427  | 1011.0563 | 1019.6855 | 1041.2243 |
| 1072.0875 | 1113.8682 | 1119.5472 | 1152.3261 | 1167.7567 | 1224.4494 |
| 1241.8834 | 1341.0869 | 1354.0826 | 1405.8608 | 1422.388  | 1441.3395 |
| 1474.0442 | 1501.9447 | 1534.6119 | 3019.6578 | 3050.4107 | 3155.5425 |
| 3182.26   | 3188.1952 | 3194.1112 | 3205.9933 | 3220.2441 | 3251.6536 |

**115**

| Atom | X        | Y        | Z        | (Angstrom) |
|------|----------|----------|----------|------------|
| C    | -0.12001 | -0.29255 | -0.1137  |            |
| C    | 0.17897  | 0.0327   | 1.28052  |            |
| C    | 1.3892   | 0.14017  | 1.84845  |            |
| C    | 2.69141  | -0.08031 | 1.1039   |            |
| C    | 2.69265  | -1.40782 | 0.41113  |            |
| C    | 1.98775  | -1.57494 | -0.89078 |            |
| C    | 0.6296   | -0.927   | -1.03132 |            |
| H    | -1.10685 | 0.02565  | -0.44324 |            |
| H    | -0.68921 | 0.24857  | 1.89819  |            |
| H    | 2.81157  | 0.72385  | 0.36295  |            |
| H    | 1.45094  | 0.38982  | 2.90395  |            |
| H    | 3.53134  | -0.00212 | 1.79926  |            |
| H    | 3.0425   | -2.28134 | 0.94814  |            |
| H    | 1.87903  | -2.64329 | -1.12016 |            |
| H    | 2.61202  | -1.18334 | -1.71679 |            |
| H    | 0.19702  | -1.03559 | -2.02418 |            |

|                 |                     |           |
|-----------------|---------------------|-----------|
| ZPE             | <b>0.137599</b>     | (Hartree) |
| CCSD(T)/cc-pVDZ | <b>-271.3768847</b> | (Hartree) |

Frequencies cm-1 :

|           |           |           |           |           |           |
|-----------|-----------|-----------|-----------|-----------|-----------|
| 89.7537   | 186.3417  | 307.9155  | 328.0935  | 382.0368  | 401.6038  |
| 523.5715  | 633.0943  | 705.1583  | 790.8626  | 845.5026  | 864.0016  |
| 894.489   | 908.0369  | 929.819   | 1008.7095 | 1025.2508 | 1041.8336 |
| 1050.9207 | 1149.544  | 1193.2542 | 1240.8722 | 1252.1471 | 1271.1128 |
| 1310.5477 | 1355.9063 | 1390.2383 | 1414.0686 | 1453.8702 | 1455.7505 |
| 1474.1843 | 1702.4503 | 1727.6967 | 2964.0945 | 3027.334  | 3066.801  |
| 3113.3736 | 3152.6127 | 3170.7026 | 3178.9131 | 3197.064  | 3219.45   |

**118**

| Atom | X        | Y        | Z        | (Angstrom) |
|------|----------|----------|----------|------------|
| C    | 0.02496  | 0.04283  | -0.06169 |            |
| C    | 0.00857  | 0.08389  | 1.27762  |            |
| C    | 1.25431  | 0.01651  | 2.04165  |            |
| C    | 2.44513  | 0.15538  | 1.43815  |            |
| C    | 2.53927  | 0.46156  | -0.05386 |            |
| C    | 1.32351  | -0.1241  | -0.81019 |            |
| C    | 2.66108  | 1.95029  | -0.17566 |            |
| H    | 3.63293  | 2.42809  | -0.14419 |            |
| H    | 3.44796  | 0.00048  | -0.45311 |            |
| H    | 1.49091  | -1.19956 | -0.97296 |            |
| H    | -0.92972 | 0.15445  | 1.81789  |            |
| H    | 1.19863  | -0.1299  | 3.1156   |            |
| H    | 3.36682  | 0.14884  | 2.01049  |            |
| H    | 1.78478  | 2.57315  | -0.03827 |            |
| H    | -0.89999 | 0.07123  | -0.6287  |            |

H 1.26215 0.32891 -1.80418

ZPE **0.136783** (Hartree)

CCSD(T)/cc-pVDZ **-271.3772124** (Hartree)

Frequencies  $\text{cm}^{-1}$  :

|           |           |           |           |           |           |
|-----------|-----------|-----------|-----------|-----------|-----------|
| 146.8319  | 181.5682  | 224.0135  | 330.9715  | 373.2804  | 509.5929  |
| 551.3466  | 569.0893  | 607.299   | 711.9595  | 796.5062  | 802.1667  |
| 868.0841  | 944.461   | 945.5951  | 984.8263  | 1000.7593 | 1007.958  |
| 1033.1887 | 1097.8365 | 1120.1731 | 1173.2326 | 1202.7424 | 1245.5705 |
| 1304.5096 | 1343.2173 | 1355.3584 | 1394.5845 | 1440.2822 | 1456.8616 |
| 1471.9629 | 1665.436  | 1725.3309 | 3024.4717 | 3083.2842 | 3101.0599 |
| 3165.8058 | 3187.0938 | 3192.3646 | 3207.9465 | 3217.0332 | 3275.2906 |

### 119

Atom X Y Z (Angstrom)

|   |          |          |          |
|---|----------|----------|----------|
| C | -1.27845 | -1.16475 | -0.00014 |
| C | -1.92449 | 0.03454  | -0.00011 |
| C | -1.20524 | 1.25491  | 0.00005  |
| C | 0.21072  | 1.23644  | 0.00007  |
| C | 0.92707  | 0.07249  | 0.00004  |
| H | -1.84149 | -2.09211 | -0.00031 |
| H | -3.00953 | 0.05948  | -0.00023 |
| H | -1.73446 | 2.19964  | 0.00009  |
| H | 0.74613  | 2.18183  | 0.00009  |
| C | 2.42557  | 0.04124  | -0.00002 |
| H | 2.81201  | -0.49231 | 0.87816  |
| H | 2.81195  | -0.49167 | -0.87862 |
| H | 2.85157  | 1.04653  | 0.00033  |
| C | 0.21857  | -1.25814 | 0.0001   |
| H | 0.56056  | -1.8557  | 0.86579  |
| H | 0.56084  | -1.85601 | -0.86526 |

ZPE **0.137194** (Hartree)

CCSD(T)/cc-pVDZ **-271.417837** (Hartree)

Frequencies  $\text{cm}^{-1}$  :

|           |           |           |           |           |           |
|-----------|-----------|-----------|-----------|-----------|-----------|
| 114.4472  | 166.4253  | 261.4187  | 337.9599  | 425.1548  | 495.5457  |
| 521.6265  | 586.7882  | 667.122   | 769.6874  | 771.5177  | 888.7407  |
| 922.4464  | 941.764   | 985.5445  | 987.3617  | 993.3753  | 1043.4855 |
| 1050.3595 | 1118.6124 | 1183.0909 | 1201.1843 | 1207.5362 | 1312.8679 |
| 1342.5794 | 1413.698  | 1430.2109 | 1438.0898 | 1443.9237 | 1479.8019 |
| 1491.7336 | 1570.5843 | 1645.5077 | 2961.636  | 2962.4282 | 3036.0201 |
| 3083.6609 | 3142.6318 | 3186.2864 | 3193.6329 | 3211.1129 | 3233.6113 |

### 47-112

Atom X Y Z (Angstrom)



|   |          |          |          |
|---|----------|----------|----------|
| C | 0.24625  | 1.22083  | -0.3724  |
| C | -1.81824 | -0.07631 | 0.09356  |
| C | -1.05421 | -1.30819 | -0.0573  |
| C | 0.29501  | -1.28878 | -0.10529 |
| C | 1.04037  | -0.02839 | -0.06106 |
| C | 2.35521  | 0.00039  | 0.20527  |
| H | 0.25888  | 1.36615  | -1.47103 |
| H | 0.72903  | 2.10567  | 0.06376  |
| H | -1.58794 | -2.2597  | -0.06212 |
| H | -2.88775 | -0.13957 | 0.29812  |
| H | 0.86441  | -2.22061 | -0.12265 |
| H | 2.90037  | 0.9431   | 0.27597  |
| H | 2.91529  | -0.92377 | 0.35971  |
| C | -1.19997 | 1.12349  | 0.03848  |
| H | -1.77329 | 2.04786  | 0.13317  |
| H | -0.60551 | 1.22269  | 2.07745  |

ZPE **0.129270** (Hartree)  
 CCSD(T)/cc-pVDZ **-271.3262573** (Hartree)

Frequencies  $\text{cm}^{-1}$  :

|           |           |           |           |           |           |
|-----------|-----------|-----------|-----------|-----------|-----------|
| -552.5776 | 117.799   | 199.7415  | 303.8674  | 374.9903  | 394.2011  |
| 446.7654  | 486.4621  | 561.381   | 604.6384  | 671.5331  | 766.6962  |
| 783.5921  | 827.1166  | 915.4946  | 938.2056  | 952.6712  | 972.5655  |
| 993.2993  | 998.4833  | 1007.3988 | 1033.0708 | 1175.1169 | 1195.3394 |
| 1222.0957 | 1316.5524 | 1343.1352 | 1399.332  | 1436.8414 | 1454.9874 |
| 1472.2702 | 1604.6886 | 1681.3535 | 1720.3135 | 3005.2001 | 3116.4823 |
| 3165.0824 | 3193.8356 | 3198.8762 | 3213.5731 | 3223.8371 | 3254.0089 |

#### 47-119

| Atom | X        | Y        | Z        | (Angstrom) |
|------|----------|----------|----------|------------|
| C    | 1.25474  | -1.16618 | -0.0741  |            |
| C    | 1.8929   | 0.00231  | -0.05806 |            |
| C    | 1.15441  | 1.2545   | 0.07836  |            |
| C    | -0.18527 | 1.27674  | 0.06621  |            |
| C    | -0.9648  | 0.05602  | -0.07679 |            |
| H    | 1.80427  | -2.09402 | -0.16802 |            |
| H    | 2.96997  | 0.04227  | -0.14803 |            |
| H    | 1.71144  | 2.17865  | 0.15552  |            |
| H    | -0.72415 | 2.21475  | 0.11508  |            |
| C    | -2.28616 | 0.09378  | -0.29424 |            |
| H    | -2.8573  | -0.80882 | -0.46674 |            |
| H    | -2.79956 | -0.52218 | 1.86862  |            |
| H    | -2.81708 | 1.03512  | -0.34679 |            |
| C    | -0.23269 | -1.25378 | 0.09754  |            |
| H    | -0.6545  | -2.01432 | -0.56133 |            |
| H    | -0.43188 | -1.61172 | 1.11821  |            |

ZPE **0.128444** (Hartree)  
 CCSD(T)/cc-pVDZ **-271.3241198** (Hartree)

Frequencies  $\text{cm}^{-1}$  :

|           |           |           |           |           |           |
|-----------|-----------|-----------|-----------|-----------|-----------|
| -294.5162 | 84.1713   | 125.1037  | 186.8805  | 276.6872  | 380.7516  |
| 438.2523  | 480.2337  | 556.2337  | 593.2975  | 685.485   | 761.4295  |
| 781.1154  | 833.4941  | 908.4682  | 936.6975  | 949.4733  | 968.1566  |
| 983.3264  | 1009.1715 | 1013.5963 | 1033.3576 | 1180.334  | 1200.8136 |
| 1221.2905 | 1318.0333 | 1343.9069 | 1401.5884 | 1436.4584 | 1447.0063 |
| 1470.5087 | 1647.575  | 1671.618  | 1730.938  | 2989.9344 | 3096.2345 |
| 3165.3091 | 3190.9661 | 3195.395  | 3210.8717 | 3221.4079 | 3254.9396 |

### 112-113

| Atom | X        | Y        | Z        | (Angstrom) |
|------|----------|----------|----------|------------|
| C    | -0.79901 | 1.03968  | 0.31364  |            |
| C    | -2.08237 | -0.25315 | 0.06866  |            |
| C    | -0.86821 | -0.60376 | -0.50353 |            |
| C    | 0.13335  | -1.4522  | -0.07946 |            |
| C    | 1.71462  | 0.37497  | 0.07015  |            |
| H    | -0.74875 | 0.99494  | 1.40221  |            |
| H    | -2.85278 | 0.24125  | -0.5166  |            |
| H    | -2.43095 | -0.67485 | 1.02191  |            |
| H    | 2.71399  | 0.75315  | 0.25217  |            |
| H    | -1.43362 | 1.85963  | -0.0135  |            |
| H    | -0.10386 | -2.4943  | 0.12751  |            |
| C    | 1.45486  | -0.95798 | 0.12418  |            |
| H    | 2.24348  | -1.65628 | 0.38435  |            |
| C    | 0.64323  | 1.37076  | -0.24558 |            |
| H    | 0.89838  | 2.35282  | 0.18019  |            |
| H    | 0.53526  | 1.5137   | -1.32652 |            |

ZPE **0.135242** (Hartree)  
 CCSD(T)/cc-pVDZ **-271.2742641** (Hartree)

Frequencies  $\text{cm}^{-1}$  :

|           |           |           |           |           |           |
|-----------|-----------|-----------|-----------|-----------|-----------|
| -547.8907 | 147.501   | 243.9748  | 300.3474  | 433.0614  | 465.1594  |
| 538.8034  | 589.2573  | 629.8979  | 719.6505  | 734.7628  | 782.3027  |
| 874.2157  | 914.2002  | 960.2407  | 968.4648  | 991.6332  | 997.7738  |
| 1078.0566 | 1078.7686 | 1146.5202 | 1183.1303 | 1196.3852 | 1216.9249 |
| 1296.2518 | 1335.0371 | 1347.1875 | 1432.6979 | 1441.1899 | 1471.1247 |
| 1490.1537 | 1541.7559 | 1629.1997 | 3029.7545 | 3032.4956 | 3078.3398 |
| 3090.3309 | 3170.3536 | 3173.764  | 3190.9329 | 3201.8754 | 3220.8645 |

### 113-114

| Atom | X       | Y        | Z        | (Angstrom) |
|------|---------|----------|----------|------------|
| C    | 0.95017 | -0.83103 | -0.37458 |            |

|   |          |          |          |
|---|----------|----------|----------|
| C | 1.64988  | 0.10741  | 0.59965  |
| C | 1.02058  | 1.03512  | -0.39569 |
| C | -0.31152 | 1.52677  | -0.0982  |
| C | -1.47817 | 0.76574  | 0.07228  |
| C | -1.53609 | -0.60698 | 0.12181  |
| H | 1.65564  | -1.43069 | -0.94858 |
| H | 2.73591  | 0.04183  | 0.61099  |
| H | 1.22167  | 0.10578  | 1.60075  |
| H | -2.49649 | -1.08746 | 0.27453  |
| H | 0.79696  | 0.01044  | -1.28681 |
| H | -0.38502 | 2.61008  | -0.06828 |
| H | -2.41313 | 1.30873  | 0.17791  |
| C | -0.3506  | -1.52723 | -0.0078  |
| H | -0.56432 | -2.27287 | -0.78412 |
| H | -0.21679 | -2.10463 | 0.91883  |

ZPE **0.134250** (Hartree)  
 CCSD(T)/cc-pVDZ **-271.282367** (Hartree)

Frequencies  $\text{cm}^{-1}$  :

|           |           |           |           |           |           |
|-----------|-----------|-----------|-----------|-----------|-----------|
| -834.7994 | 107.7428  | 318.1916  | 365.5988  | 479.0626  | 489.4812  |
| 534.2839  | 646.5962  | 686.3604  | 749.5259  | 812.1944  | 834.1577  |
| 883.7134  | 942.1261  | 973.3698  | 976.9286  | 984.8402  | 1051.3536 |
| 1083.0776 | 1097.5115 | 1133.4579 | 1167.2252 | 1203.2534 | 1212.3438 |
| 1246.9357 | 1329.6318 | 1353.6564 | 1381.4607 | 1433.143  | 1486.1635 |
| 1513.3235 | 1528.9297 | 1545.73   | 2247.4289 | 3032.174  | 3065.9951 |
| 3111.7096 | 3145.8051 | 3181.2985 | 3189.23   | 3195.0715 | 3208.9431 |

#### 114-115

| Atom | X        | Y        | Z        | (Angstrom) |
|------|----------|----------|----------|------------|
| C    | 0.01422  | 0.01685  | 0.05587  |            |
| C    | -0.10146 | -0.0039  | 1.54869  |            |
| C    | 1.68244  | -0.24238 | 2.46193  |            |
| C    | 2.68446  | -0.07996 | 1.52028  |            |
| C    | 2.5289   | -0.40892 | 0.13198  |            |
| C    | 1.34179  | -0.4289  | -0.51931 |            |
| C    | 0.49027  | -1.13202 | 2.30324  |            |
| H    | 1.33289  | -0.6679  | -1.5787  |            |
| H    | 3.59611  | 0.42373  | 1.82586  |            |
| H    | 0.67349  | -2.02853 | 1.70847  |            |
| H    | 0.00465  | -1.37876 | 3.24631  |            |
| H    | -0.70617 | 0.73304  | 2.0597   |            |
| H    | -0.77714 | -0.61945 | -0.38451 |            |
| H    | -0.20838 | 1.02714  | -0.31794 |            |
| H    | 1.78035  | 0.26412  | 3.41736  |            |
| H    | 3.43246  | -0.57812 | -0.44966 |            |

ZPE **0.136582** (Hartree)

CCSD(T)/cc-pVDZ **-271.361142** (Hartree)

Frequencies cm<sup>-1</sup> :

|           |           |           |           |           |           |
|-----------|-----------|-----------|-----------|-----------|-----------|
| -701.2971 | 139.725   | 308.4268  | 348.0966  | 416.1165  | 459.8744  |
| 532.9563  | 603.1576  | 684.1592  | 769.907   | 850.4587  | 860.0838  |
| 893.5621  | 921.3303  | 944.7152  | 966.2941  | 989.6601  | 1038.7427 |
| 1064.7319 | 1139.7467 | 1172.8154 | 1216.2394 | 1220.091  | 1231.8962 |
| 1239.3827 | 1350.0606 | 1363.7961 | 1403.3393 | 1449.0804 | 1460.5405 |
| 1484.4651 | 1526.5375 | 1664.0931 | 2950.3573 | 3035.8199 | 3096.0702 |
| 3164.117  | 3172.6502 | 3187.3755 | 3190.6642 | 3205.3912 | 3236.2019 |

### 114-118

| Atom | X        | Y        | Z        | (Angstrom) |
|------|----------|----------|----------|------------|
| C    | -0.00911 | 0.04423  | -0.00144 |            |
| C    | -0.00316 | 0.00219  | 1.35013  |            |
| C    | 1.22376  | -0.05982 | 2.09933  |            |
| C    | 2.44105  | 0.07574  | 1.46515  |            |
| C    | 2.51458  | 0.35381  | -0.01169 |            |
| C    | 1.26346  | -0.05316 | -0.80338 |            |
| C    | 2.65405  | 1.78029  | 0.37018  |            |
| H    | 3.62872  | 2.21088  | 0.55408  |            |
| H    | 3.41796  | -0.0449  | -0.47451 |            |
| H    | 1.38217  | -1.09062 | -1.14958 |            |
| H    | -0.94263 | 0.01232  | 1.89359  |            |
| H    | 1.18589  | -0.17064 | 3.177    |            |
| H    | 3.36936  | -0.00862 | 2.0155   |            |
| H    | 1.775    | 2.37712  | 0.5684   |            |
| H    | -0.94817 | 0.08015  | -0.54386 |            |
| H    | 1.19758  | 0.55968  | -1.70977 |            |

ZPE **0.136494** (Hartree)

CCSD(T)/cc-pVDZ **-271.3666862** (Hartree)

Frequencies cm<sup>-1</sup> :

|           |           |           |           |           |           |
|-----------|-----------|-----------|-----------|-----------|-----------|
| -654.6608 | 175.8334  | 300.5513  | 334.3428  | 479.625   | 516.671   |
| 558.1936  | 575.9612  | 658.5726  | 687.3736  | 786.5459  | 819.2885  |
| 876.9025  | 912.5568  | 936.0031  | 954.6453  | 993.7204  | 1003.7078 |
| 1020.4607 | 1086.9633 | 1145.0095 | 1170.8071 | 1196.5808 | 1234.8456 |
| 1271.6296 | 1353.255  | 1366.7    | 1401.4654 | 1444.031  | 1461.7345 |
| 1475.0209 | 1481.5843 | 1668.3599 | 3027.5587 | 3082.8837 | 3126.5663 |
| 3184.8069 | 3190.3347 | 3207.2298 | 3214.9302 | 3229.5139 | 3301.3103 |

### 115-9

| Atom | X        | Y        | Z        | (Angstrom) |
|------|----------|----------|----------|------------|
| C    | -0.19222 | -0.35492 | -0.01766 |            |
| C    | 0.08287  | 0.45037  | 1.15362  |            |
| C    | 1.15304  | 0.33502  | 1.98158  |            |
| C    | 2.22494  | -0.6419  | 1.8621   |            |

|   |          |          |          |
|---|----------|----------|----------|
| C | 2.62357  | -1.22072 | 0.69678  |
| C | 2.20937  | -0.66646 | -0.63839 |
| C | 0.73308  | -0.92815 | -0.81038 |
| H | -1.2417  | -0.51073 | -0.2546  |
| H | -0.70298 | 1.13685  | 1.45781  |
| H | 3.70205  | 0.6626   | 2.1656   |
| H | 1.15698  | 0.94029  | 2.88304  |
| H | 2.58341  | -1.06645 | 2.79596  |
| H | 3.288    | -2.07828 | 0.72629  |
| H | 2.78327  | -1.12077 | -1.44715 |
| H | 2.3962   | 0.41541  | -0.65888 |
| H | 0.41607  | -1.59872 | -1.60342 |

ZPE **0.130546** (Hartree)

CCSD(T)/cc-pVDZ **-271.3272798** (Hartree)

Frequencies  $\text{cm}^{-1}$  :

|           |           |           |           |           |           |
|-----------|-----------|-----------|-----------|-----------|-----------|
| -842.4369 | 210.0964  | 271.8237  | 307.2526  | 358.8986  | 408.9705  |
| 447.4344  | 465.8005  | 629.0954  | 667.2975  | 747.9417  | 785.2618  |
| 817.484   | 883.0658  | 937.9458  | 945.6776  | 971.3231  | 1001.8299 |
| 1010.4232 | 1025.5157 | 1048.2682 | 1071.7822 | 1198.569  | 1218.7467 |
| 1252.3693 | 1264.7875 | 1325.8824 | 1379.783  | 1418.9732 | 1472.9114 |
| 1480.932  | 1613.2687 | 1655.4611 | 1706.6134 | 3032.0732 | 3140.9922 |
| 3169.37   | 3173.932  | 3181.0936 | 3194.6772 | 3202.2792 | 3206.9759 |

### 118-119

| Atom | X        | Y        | Z        | (Angstrom) |
|------|----------|----------|----------|------------|
| C    | -1.24113 | -1.17598 | -0.07955 |            |
| C    | -1.88814 | 0.00539  | -0.08975 |            |
| C    | -1.17469 | 1.25291  | 0.06763  |            |
| C    | 0.19113  | 1.27446  | 0.07852  |            |
| C    | 0.95653  | 0.06218  | -0.05597 |            |
| H    | -1.78469 | -2.10766 | -0.19546 |            |
| H    | -2.96376 | 0.03429  | -0.23015 |            |
| H    | -1.7323  | 2.17972  | 0.13193  |            |
| H    | 0.7229   | 2.22017  | 0.12943  |            |
| C    | 2.43843  | 0.03058  | -0.02978 |            |
| H    | 2.94962  | -0.92035 | -0.01308 |            |
| H    | 1.56194  | 0.07419  | -1.13906 |            |
| H    | 3.00424  | 0.95166  | -0.01569 |            |
| C    | 0.23938  | -1.25493 | 0.1899   |            |
| H    | 0.41032  | -1.54421 | 1.24481  |            |
| H    | 0.70269  | -2.05544 | -0.39877 |            |

ZPE **0.132728** (Hartree)

CCSD(T)/cc-pVDZ **-271.3240302** (Hartree)

Frequencies  $\text{cm}^{-1}$  :

|            |           |           |           |           |           |
|------------|-----------|-----------|-----------|-----------|-----------|
| -1879.0782 | 123.1292  | 270.5311  | 329.5621  | 425.8827  | 432.9467  |
| 478.2098   | 553.0213  | 588.547   | 619.3908  | 713.8629  | 763.1994  |
| 785.554    | 920.8525  | 937.1185  | 958.0401  | 968.8827  | 996.7112  |
| 999.4239   | 1024.8818 | 1154.7557 | 1171.2205 | 1197.5038 | 1229.13   |
| 1266.4849  | 1327.2358 | 1367.1006 | 1419.265  | 1442.8454 | 1463.2332 |
| 1486.9456  | 1581.1489 | 1698.2028 | 2228.613  | 2947.7539 | 3070.2544 |
| 3185.6974  | 3190.8031 | 3193.4513 | 3211.7373 | 3225.416  | 3312.3665 |

119-44

| Atom | X        | Y        | Z        | (Angstrom) |
|------|----------|----------|----------|------------|
| C    | 1.19713  | 1.18967  | -0.0953  |            |
| C    | 1.91317  | 0.00142  | -0.02006 |            |
| C    | 1.23124  | -1.21497 | 0.04733  |            |
| C    | -0.1664  | -1.24074 | 0.01923  |            |
| C    | -0.90567 | -0.06447 | -0.05354 |            |
| H    | 1.71918  | 2.145    | -0.15987 |            |
| H    | 3.0036   | 0.01807  | -0.02625 |            |
| H    | 1.78837  | -2.15089 | 0.10415  |            |
| H    | -0.69052 | -2.19832 | 0.04824  |            |
| C    | -2.40711 | -0.06415 | -0.05359 |            |
| H    | -2.80605 | 0.49665  | -0.91171 |            |
| H    | -2.81003 | -1.08443 | -0.08939 |            |
| H    | -2.78263 | 0.42457  | 0.86069  |            |
| C    | -0.21005 | 1.1694   | -0.05124 |            |
| H    | -0.5703  | 1.60393  | 1.66939  |            |
| H    | -0.76539 | 2.0885   | -0.2523  |            |

ZPE **0.130342** (Hartree)

CCSD(T)/cc-pVDZ **-271.3656771** (Hartree)

Frequencies  $\text{cm}^{-1}$  :

|           |           |           |           |           |           |
|-----------|-----------|-----------|-----------|-----------|-----------|
| -879.4332 | 97.1625   | 205.0059  | 287.828   | 341.9057  | 406.1268  |
| 454.9669  | 518.2669  | 528.8662  | 629.4115  | 724.1074  | 754.8363  |
| 803.0831  | 882.4156  | 956.351   | 996.0541  | 1010.488  | 1017.8941 |
| 1039.5122 | 1058.0531 | 1069.2824 | 1106.4697 | 1177.0042 | 1197.1869 |
| 1238.9522 | 1318.6948 | 1346.5358 | 1413.693  | 1466.3511 | 1487.7321 |
| 1504.7468 | 1536.2901 | 1635.0097 | 1658.3197 | 3050.4327 | 3113.1247 |
| 3151.3329 | 3185.1757 | 3195.0312 | 3206.3863 | 3216.1648 | 3227.0549 |

## References

- [1] J.D. Savee, S. Soorkia, O. Welz, T.M. Selby, C.A. Taatjes, D.L. Osborn, Absolute photoionization cross-section of the propargyl radical, *The Journal of chemical physics* 136(13) (2012) 134307.
- [2] B. Yang, J. Wang, T.A. Cool, N. Hansen, S. Skeen, D.L. Osborn, Absolute photoionization cross-sections of some combustion intermediates, *International Journal of Mass Spectrometry* 309 (2012) 118-128.

- [3] G.T. Buckingham, T.K. Ormond, J.P. Porterfield, P. Hemberger, O. Kostko, M. Ahmed, D.J. Robichaud, M.R. Nimlos, J.W. Daily, G.B. Ellison, The thermal decomposition of the benzyl radical in a heated micro-reactor. I. Experimental findings, *J Chem Phys* 142(4) (2015) 044307.
- [4] L. Zhao, W. Lu, M. Ahmed, M.V. Zagidullin, V.N. Azyazov, A.N. Morozov, A.M. Mebel, R.I. Kaiser, Gas-phase synthesis of benzene via the propargyl radical self-reaction, *Sci Adv* 7(21) (2021).
- [5] Z. Zhou, M. Xie, Z. Wang, F. Qi, Determination of absolute photoionization cross-sections of aromatics and aromatic derivatives, *Rapid Communications in Mass Spectrometry: An International Journal Devoted to the Rapid Dissemination of Up-to-the-Minute Research in Mass Spectrometry* 23(24) (2009) 3994-4002.
- [6] D. Trogolo, A. Maranzana, G. Ghigo, G. Tonachini, Reaction between propargyl radical and 1,3-butadiene to form five to seven membered rings. Theoretical study, *Combustion and Flame* 168 (2016) 331-341.
- [7] Y. Hidaka, T. Higashihara, N. Ninomiya, H. Masaoka, T. Nakamura, H.J. Kawano, Shock tube and modeling study of 1, 3-butadiene pyrolysis, 28(2) (1996) 137-151.
- [8] W. Tsang, V.J. Mokrushin, Mechanism and rate constants for 1, 3-butadiene decomposition, 28(2) (2000) 1717-1723.
- [9] H. Wang, M.J. Frenklach, flame, A detailed kinetic modeling study of aromatics formation in laminar premixed acetylene and ethylene flames, 110(1-2) (1997) 173-221.
- [10] P.L. Laine, Y.S. Sohn, J.M. Nicovich, M.L. McKee, P.H. Wine, Kinetics of Elementary Steps in the Reactions of Atomic Bromine with Isoprene and 1, 3-Butadiene under Atmospheric Conditions, 116(24) (2012) 6341-6357.
- [11] H. Wang, M.J. Frenklach, Calculations of rate coefficients for the chemically activated reactions of acetylene with vinylic and aromatic radicals, 98(44) (1994) 11465-11489.
- [12] D. Trogolo, A. Maranzana, G. Ghigo, G.J. Tonachini, First ring formation by radical addition of propargyl to but-1-ene-3-yne in combustion. Theoretical study of the C<sub>7</sub>H<sub>7</sub> radical system, 118(2) (2014) 427-440.
- [13] D. Trogolo, A. Maranzana, G. Ghigo, G.J. Tonachini, Flame, Reaction between propargyl radical and 1, 3-butadiene to form five to seven membered rings. Theoretical study, 168 (2016) 331-341.
- [14] J.A. Miller, S.J. Klippenstein, The recombination of propargyl radicals and other reactions on a C<sub>6</sub>H<sub>6</sub> potential, 107(39) (2003) 7783-7799.
- [15] W. Metcalfe, S. Dooley, F.J. Dryer, Fuels, Comprehensive detailed chemical kinetic modeling study of toluene oxidation, 25(11) (2011) 4915-4936.
- [16] S.J. Klippenstein, L.B. Harding, Y.J. Georgievskii, On the formation and decomposition of C<sub>7</sub>H<sub>8</sub>, 31(1) (2007) 221-229.
- [17] H. Wang, A. Laskin, N.W. Moriarty, M.J. Frenklach, On unimolecular decomposition of phenyl radical, 28(2) (2000) 1545-1555.
- [18] R.S. Tranter, S.J. Klippenstein, L.B. Harding, B.R. Giri, X. Yang, J.H. Kiefer, Experimental and theoretical investigation of the self-reaction of phenyl radicals, 114(32) (2010) 8240-8261.
